# Supplementary material
Source: Springer Nature journal article supplement (https://www.springermedizin.de/resource/supplementary/12889_2011_3311_MOESM4_ESM.pdf/9488784)

# Males

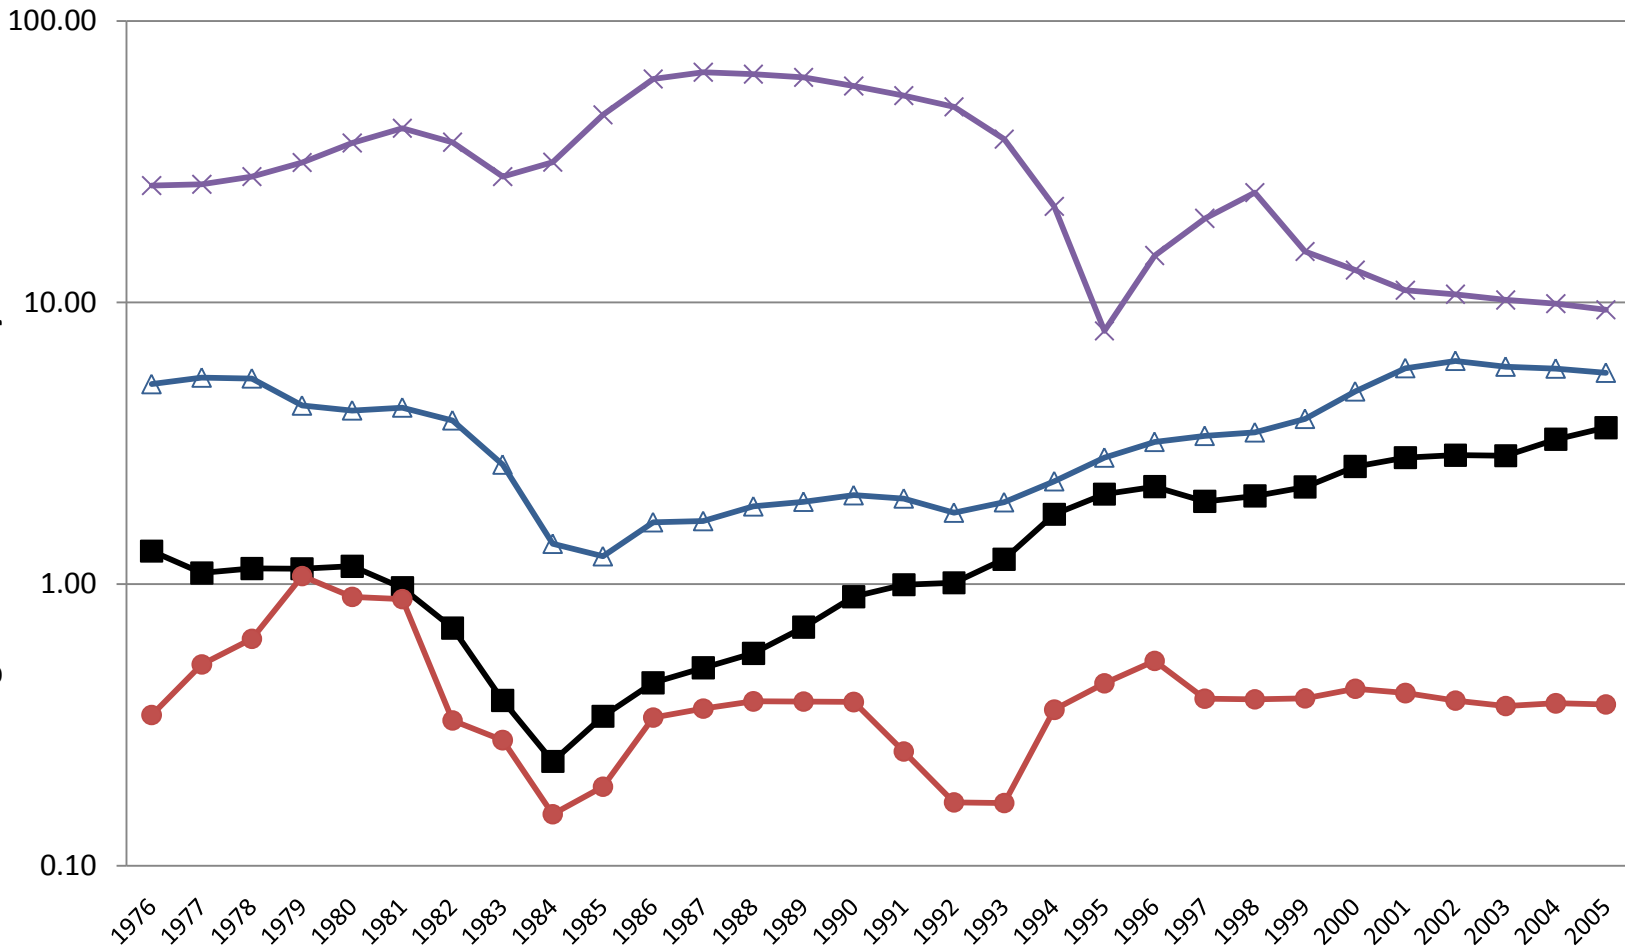

- suicide
- accidental poisoning
- ▲ other accidents
- ✕ undetermined

# Females

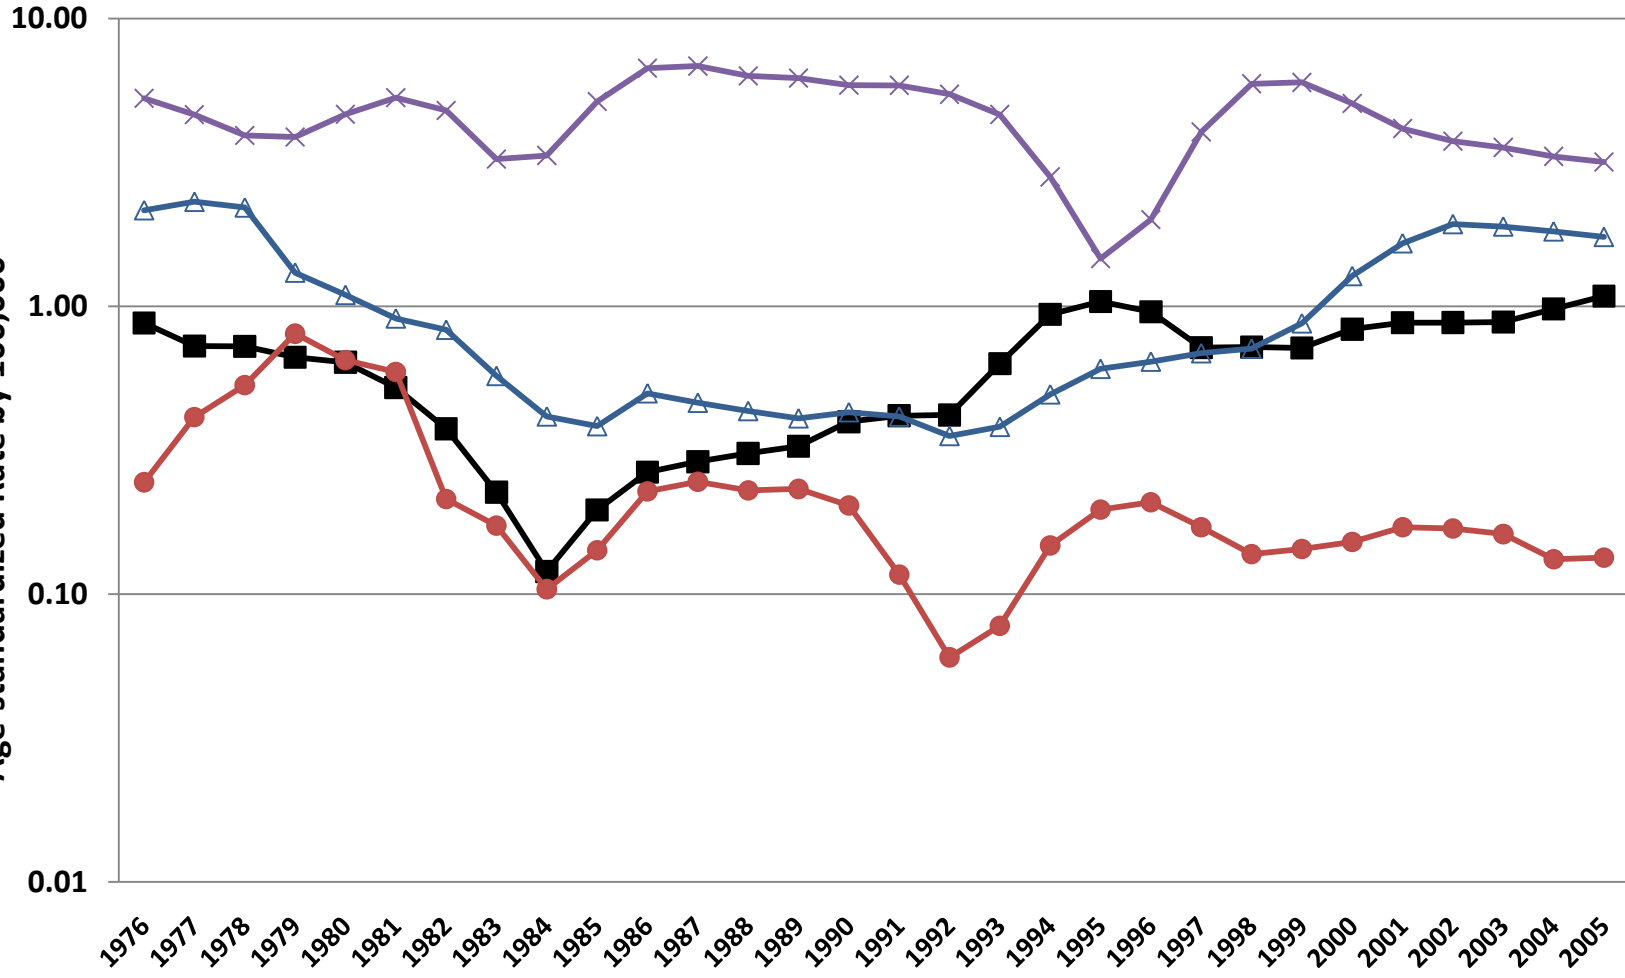

Year

Supplement: MOESM4 [file 9488784]
